# Supplementary material for: Four-level levodopa adsorption on C60 fullerene for transdermal and oral administration: a computational study
Source: Royal Society of Chemistry journal article supplement (doi:10.1039/c2ra20606d), 2012-01-01
Supplement: c2ra20606d.pdf [file c2ra20606d.pdf]

**Table 1** Calculated normal mode wavenumbers (in  $\text{cm}^{-1}$ ) for C60, isolated LDOPAc (I), and the A, B, C, D adsorption geometries of LDOPAc on C60.

| C60      | I        | A        | B        | C        | D        | C60      | I        | A        | B        | C        | D        |
|----------|----------|----------|----------|----------|----------|----------|----------|----------|----------|----------|----------|
|          |          | 1.0027   | 3.6697   | 1.4578   | 3.5285   | 438.8003 |          | 441.8284 | 442.282  | 441.4935 | 441.7234 |
|          |          | 4.8873   | 7.8372   | 5.2687   | 6.2182   | 438.8004 |          | 442.1686 | 442.4141 | 442.0369 | 442.3489 |
|          | 16.9107  | 12.0794  | 12.5303  | 9.6473   | 10.9723  | 438.8005 |          | 442.7335 | 442.9992 | 442.6216 | 442.9286 |
|          | 20.4722  | 12.8793  | 12.9715  | 11.3178  | 14.2854  |          | 444.0977 | 451.6592 | 456.5358 | 457.3361 | 458.5686 |
|          |          | 21.4988  | 17.7851  | 20.3369  | 20.7169  |          | 451.4645 | 459.0164 | 467.5748 | 469.8275 | 469.8275 |
|          |          | 24.079   | 30.4802  | 24.7349  | 24.0658  |          | 467.8030 | 479.6696 | 486.3493 | 477.4466 | 486.3794 |
|          |          | 37.8164  | 37.619   | 34.6217  | 35.4162  |          |          | 486.4424 | 490.5914 | 486.3398 | 491.8067 |
|          |          | 44.3492  | 54.5677  | 50.4915  | 55.9209  |          |          | 492.1475 | 492.3432 | 491.5099 | 492.0522 |
|          | 64.7697  | 65.6756  | 69.4824  | 64.179   | 70.1595  |          |          | 492.7759 | 492.6645 | 492.0792 | 492.2179 |
|          | 85.4656  | 78.3041  | 101.1702 | 94.4499  | 105.0993 |          |          | 492.9834 | 493.1676 | 492.6108 | 494.1733 |
|          |          | 163.3653 | 162.6624 | 183.8272 | 177.5474 |          |          | 493.5913 | 493.297  | 493.9331 | 498.4019 |
|          |          | 174.3628 | 177.2873 | 187.0496 | 193.068  |          |          | 512.1211 | 520.6558 | 518.2305 | 521.1753 |
|          | 232.1961 | 231.7172 | 244.6293 | 235.1209 | 242.8444 |          |          | 541.791  | 542.3059 | 540.9017 | 541.5498 |
|          |          | 249.3333 | 266.4134 | 252.2075 | 267.6385 |          |          | 542.503  | 542.6313 | 541.9321 | 542.2894 |
|          |          | 267.7616 | 267.6465 | 267.5848 | 267.5802 |          |          | 543.3096 | 543.2489 | 542.3312 | 542.8525 |
|          |          | 268.1284 | 267.8779 | 267.6829 | 268.2193 |          |          | 543.4842 | 543.6171 | 543.4436 | 543.5235 |
|          |          | 268.2506 | 268.1777 | 267.9431 | 268.3953 |          |          | 543.9566 | 544.187  | 543.8297 | 544.0013 |
|          |          | 268.3916 | 268.2823 | 268.2589 | 268.6875 |          |          | 544.7263 | 544.5965 | 544.4814 | 544.4096 |
|          | 274.7160 | 268.7416 | 268.8384 | 269.1369 | 280.8318 |          |          | 545.0869 | 545.0374 | 544.7642 | 544.6623 |
|          |          | 292.9431 | 292.8768 | 286.3771 | 295.1134 |          |          | 545.6093 | 546.3566 | 545.9781 | 545.4871 |
|          |          | 305.8217 | 304.9141 | 301.7254 | 304.8218 |          | 548.9811 | 546.8416 | 548.6514 | 549.5423 | 554.6315 |
|          | 340.5463 | 340.8266 | 328.1804 | 321.6668 | 348.5012 |          |          | 570.289  | 570.6316 | 570.7885 | 570.815  |
| 343.7034 |          | 348.2594 | 348.0879 | 347.8502 | 348.9396 |          |          | 570.8954 | 570.795  | 570.8279 | 570.9823 |
| 343.7035 |          | 348.9365 | 348.8488 | 348.6574 | 349.3518 |          |          | 570.9636 | 571.1733 | 571.241  | 571.2186 |
| 343.7036 |          | 349.3163 | 349.6344 | 349.4645 | 352.9168 |          |          | 574.4962 | 574.3385 | 574.2595 | 574.2893 |
| 359.4862 |          | 360.1436 | 359.7626 | 358.5529 | 359.5375 |          |          | 574.5817 | 574.6799 | 574.5163 | 574.4235 |
| 359.4863 |          | 360.5787 | 360.861  | 359.456  | 360.1911 |          |          | 574.8235 | 574.8222 | 574.7359 | 574.9186 |
| 359.4867 |          | 361.1418 | 361.0215 | 360.7034 | 360.5778 |          |          | 577.7715 | 578.5844 | 577.4521 | 578.4434 |
|          |          | 361.1888 | 361.6997 | 360.9345 | 360.9294 |          |          | 579.1167 | 579.0606 | 578.2998 | 578.8702 |
|          | 360.9987 | 361.7295 | 367.5497 | 362.1198 | 362.1754 |          |          | 579.6678 | 579.4537 | 579.7115 | 579.2605 |
|          |          | 378.4947 | 384.6674 | 380.617  | 411.0764 |          |          | 582.9713 | 579.8575 | 583.2235 | 580.0232 |
| 408.6332 |          | 410.9986 | 410.9978 | 397.1177 | 411.3662 |          |          | 583.274  | 582.8699 | 583.256  | 583.1745 |
| 408.6333 |          | 411.1072 | 411.0722 | 411.285  | 411.5075 |          |          | 583.3071 | 583.208  | 583.4431 | 583.2125 |
| 408.6334 |          | 411.2174 | 411.3353 | 411.4469 | 411.6069 |          |          | 583.5038 | 583.3163 | 583.6643 | 583.6677 |
| 408.6336 |          | 411.3667 | 411.5018 | 411.5071 | 411.7259 |          |          | 586.1523 | 583.6423 | 584.0986 | 583.8106 |
| 408.6339 |          | 411.5787 | 411.5777 | 411.5879 | 421.6018 |          | 585.6324 | 622.409  | 603.5079 | 598.8848 | 598.0908 |
|          |          | 417.1087 | 440.576  | 411.7002 | 439.7505 |          | 625.1851 | 674.2562 | 656.5211 | 655.8082 | 662.4228 |
| 438.8    |          | 440.8682 | 441.5023 | 439.9274 | 440.8375 |          |          | 677.4897 | 677.67   | 677.2978 | 677.7397 |
| 438.8001 |          | 441.3724 | 441.8677 | 441.3431 | 441.4775 |          |          | 677.9287 | 677.8244 | 678.0257 | 677.9258 |
| 438.8003 |          | 441.8284 | 442.282  | 441.4935 | 441.7234 |          |          | 677.9917 | 678.022  | 678.3258 | 678.0671 |

**Table 2** Calculated normal mode wavenumbers (in  $\text{cm}^{-1}$ ) for C60, isolated LDOPAc (I), and the A, B, C, D adsorption geometries of LDOPAc on C60.

| C60      | I        | A        | B        | C        | D        | C60       | I        | A        | B        | C        | D        |
|----------|----------|----------|----------|----------|----------|-----------|----------|----------|----------|----------|----------|
| 679.8754 | 676.1770 | 678.2636 | 678.1949 | 678.6038 | 678.3103 | 805.2174  | 808.2043 | 808.2039 | 808.4228 | 808.6771 | 808.6771 |
|          | 707.3510 | 678.3575 | 678.2631 | 678.7589 | 678.7068 | 805.2177  | 808.6788 | 808.406  | 808.7051 | 808.8103 | 808.8103 |
|          |          | 709.3435 | 716.4505 | 710.199  | 713.8431 |           | 818.0997 | 808.5512 | 809.0547 | 823.9648 | 823.9648 |
|          |          | 716.744  | 717.6598 | 716.8548 | 716.4187 | 814.66    | 823.4462 | 823.9218 | 819.9511 | 824.3465 | 824.3465 |
| 721.0946 |          | 717.6522 | 718.5033 | 717.7508 | 716.9791 | 840.7505  | 823.6044 | 824.164  | 823.4631 | 824.4301 | 824.4301 |
| 721.0947 |          | 718.7584 | 719.0792 | 718.6101 | 717.9832 | 840.7508  | 824.1359 | 824.2434 | 824.1006 | 824.4959 | 824.4959 |
| 721.0948 |          | 719.0509 | 719.4086 | 719.6379 | 718.6538 | 840.7511  | 842.2088 | 856.78   | 824.4166 | 856.728  | 856.728  |
| 721.095  |          | 719.5371 | 719.7116 | 719.9572 | 719.3012 |           | 873.8337 | 897.5765 | 904.929  | 874.9041 | 874.9041 |
| 721.095  |          | 722.0035 | 721.6599 | 721.7757 | 721.1819 |           | 912.4022 | 912.4022 | 912.5989 | 913.295  | 913.295  |
| 724.708  |          | 723.8063 | 723.2015 | 721.8288 | 723.2277 |           | 928.2552 | 933.0214 | 944.565  | 921.9112 | 921.9112 |
| 724.7081 |          | 723.785  | 723.752  | 723.5605 | 723.4148 |           | 956.8207 | 940.4557 | 962.2057 | 942.2686 | 942.2686 |
| 724.7081 |          | 724.281  | 724.895  | 724.0494 | 729.948  |           | 967.0287 | 967.1075 | 967.1127 | 967.0336 | 967.0336 |
| 738.7585 |          | 734.1121 | 735.1402 | 736.3578 | 733.5391 | 966.2475  | 967.1305 | 967.1075 | 967.2734 | 967.1302 | 967.1302 |
| 738.7587 |          | 737.9935 | 735.1739 | 737.1649 | 735.7458 | 977.9638  | 967.2763 | 967.4332 | 967.5645 | 967.587  | 967.587  |
| 738.7588 |          | 738.496  | 736.3064 | 738.2125 | 736.7303 | 977.9640  | 967.3394 | 967.7666 | 967.7108 | 967.7063 | 967.7063 |
| 744.1928 |          | 738.7037 | 737.0141 | 738.4487 | 736.9762 | 977.9642  | 967.4528 | 968.0135 | 967.744  | 968.1043 | 968.1043 |
| 744.193  |          | 739.5183 | 737.9076 | 739.5331 | 737.614  | 983.2239  | 967.9151 | 968.1876 | 968.2224 | 968.3174 | 968.3174 |
| 744.1933 |          | 739.839  | 738.0928 | 739.7578 | 738.0118 | 983.2240  | 968.1078 | 968.3886 | 968.3919 | 968.7615 | 968.7615 |
| 744.1936 |          | 740.4162 | 738.9182 | 740.0393 | 738.2811 | 983.2243  | 968.3518 | 988.4353 | 977.935  | 998.299  | 998.299  |
| 744.1937 |          | 740.6513 | 739.4104 | 740.4508 | 739.0488 | 983.2244  | 981.9853 | 1024.974 | 1004.835 | 1005.531 | 1005.531 |
| 753.2669 |          | 741.4756 | 742.2198 | 741.55   | 740.7089 | 1094.8665 | 1053.636 | 1047.257 | 1051.475 | 1045.377 | 1045.377 |
| 753.2669 |          | 741.5623 | 742.0085 | 740.5295 | 740.9044 | 1094.8666 | 1095.272 | 1095.527 | 1095.362 | 1095.514 | 1095.514 |
| 753.2671 |          | 742.8477 | 742.2198 | 742.0085 | 741.9675 | 1094.8667 | 1095.506 | 1095.756 | 1095.744 | 1095.664 | 1095.664 |
| 757.1575 |          | 742.4629 | 741.4222 | 742.2176 | 741.9675 | 1094.8668 | 1095.569 | 1095.962 | 1096.014 | 1096.195 | 1096.195 |
| 757.1575 |          | 743.0971 | 742.6912 | 743.4833 | 742.5569 |           | 1098.892 | 1099.538 | 1099.558 | 1099.768 | 1099.768 |
| 757.1576 | 743.9756 | 743.5612 | 748.4798 | 744.0751 | 744.6465 |           | 1098.892 | 1099.538 | 1099.558 | 1099.768 | 1099.768 |
| 757.1577 |          | 744.2414 | 749.2393 | 751.3266 | 747.1019 |           | 1099.576 | 1099.754 | 1099.7   | 1100.085 | 1100.085 |
| 757.1575 |          | 744.5612 | 748.4798 | 744.0751 | 744.6465 |           | 1099.505 | 1099.754 | 1099.7   | 1100.056 | 1100.056 |
| 757.1575 |          | 746.7031 | 761.3892 | 761.419  | 767.1734 |           | 1099.636 | 1100.454 | 1100.489 | 1100.596 | 1100.596 |
| 757.1576 |          | 767.5211 | 767.6953 | 768.0593 | 768.0604 |           | 1100.138 | 1100.701 | 1100.878 | 1101.01  | 1101.01  |
| 767.1193 |          | 767.6648 | 768.0313 | 768.2394 | 768.1414 |           | 1100.468 | 1100.784 | 1104.009 | 1104.142 | 1104.142 |
| 767.1194 | 766.4463 | 768.0841 | 768.038  | 768.3133 | 768.2182 | 1127.2449 | 1125.765 | 1134.705 | 1121.011 | 1142.933 | 1142.933 |
| 767.1196 |          | 768.4029 | 768.1312 | 768.6182 | 768.4215 | 1127.2452 | 1157.599 | 1176.119 | 1169.074 | 1161.329 | 1161.329 |
| 788.1376 |          | 773.1576 | 773.2534 | 773.3266 | 772.9919 | 1127.2460 | 1172.59  | 1183.495 | 1181.835 | 1176.906 | 1176.906 |
| 788.1378 |          | 773.2874 | 773.3695 | 773.3695 | 773.1421 | 1127.2467 | 1180.378 | 1190.973 | 1188.094 | 1192.111 | 1192.111 |
| 788.1381 |          | 773.589  | 773.6642 | 773.5079 | 773.3474 | 1127.2471 | 1192.01  | 1192.354 | 1192.141 | 1192.546 | 1192.546 |
| 788.1383 |          | 773.7738 | 773.6881 | 773.6335 | 773.9946 |           | 1192.329 | 1192.692 | 1192.712 | 1192.876 | 1192.876 |
| 788.1384 |          | 773.8555 | 773.8553 | 773.9913 | 774.4689 |           | 1192.628 | 1192.793 | 1193.18  | 1193.1   | 1193.1   |
|          | 784.9099 | 784.9471 | 785.0784 | 783.4884 | 778.6416 | 1201.3567 | 1202.827 | 1202.71  | 1202.77  | 1202.845 | 1202.845 |
| 805.2172 |          | 808.0931 | 802.1282 | 803.3857 | 808.4234 | 1201.3569 | 1203.053 | 1203.361 | 1203.37  | 1203.37  | 1203.37  |

**Table 3** Calculated normal mode wavenumbers (in  $\text{cm}^{-1}$ ) for C60, isolated LDOPAc (I), and the A, B, C, D adsorption geometries of LDOPAc on C60.

| C60      | I         | A        | B        | C        | D        | C60       | I         | A        | B        | C        | D        |
|----------|-----------|----------|----------|----------|----------|-----------|-----------|----------|----------|----------|----------|
| 1201.358 |           | 1203.71  | 1203.514 | 1203.832 | 1204.112 | 1372.232  | 1434.8401 | 1420.448 | 1434.718 | 1421.19  | 1462.384 |
|          |           | 1206.828 | 1207.7   | 1207.37  | 1204.653 | 1454.832  |           | 1464.171 | 1466.242 | 1464.572 | 1465.114 |
|          |           | 1207.868 | 1208.268 | 1208.668 | 1207.902 | 1454.832  |           | 1466.359 | 1466.677 | 1467.122 | 1466.607 |
|          |           | 1208.105 | 1208.825 | 1208.779 | 1208.63  | 1454.832  |           | 1466.974 | 1467.081 | 1467.185 | 1466.874 |
|          |           | 1208.39  | 1209.482 | 1209.923 | 1208.898 | 1454.832  |           | 1467.209 | 1467.088 | 1467.401 | 1467.278 |
|          |           | 1208.767 | 1209.776 | 1209.213 | 1209.758 | 1454.832  |           | 1467.404 | 1467.307 | 1467.677 | 1467.477 |
| 1214.643 | 1208.7662 | 1212.007 | 1212.007 | 1209.499 | 1210.051 | 1460.389  |           | 1467.555 | 1467.427 | 1467.789 | 1467.783 |
| 1214.643 | 1218.1778 | 1217.511 | 1217.511 | 1215.519 | 1214.126 | 1460.389  |           | 1467.687 | 1467.667 | 1467.972 | 1467.972 |
| 1214.644 | 1255.3085 | 1220.87  | 1228.026 | 1224.652 | 1241.399 | 1460.389  |           | 1467.931 | 1467.703 | 1468.314 | 1468.271 |
| 1245.416 |           | 1260.723 | 1262.181 | 1261.417 | 1261.612 | 1464.222  |           | 1468.256 | 1468.133 | 1468.369 | 1468.914 |
| 1245.416 |           | 1261.409 | 1262.464 | 1261.688 | 1262.206 | 1464.222  |           | 1482.678 | 1482.696 | 1482.361 | 1481.423 |
| 1245.416 |           | 1262.557 | 1262.946 | 1263.138 | 1263.769 | 1464.223  |           | 1484.484 | 1484.171 | 1484.822 | 1483.884 |
| 1245.416 |           | 1272.538 | 1272.17  | 1270.816 | 1272.855 | 1464.223  |           | 1484.697 | 1484.774 | 1485.533 | 1486.97  |
| 1245.417 |           | 1272.705 | 1272.77  | 1273.058 | 1273.29  | 1503.413  | 1498.2918 | 1498.895 | 1505.535 | 1496.648 | 1500.219 |
| 1276.967 |           | 1273.033 | 1273.384 | 1273.632 | 1273.653 |           | 1518.1120 | 1519.904 | 1508.794 | 1510.278 | 1516.543 |
| 1276.967 |           | 1273.547 | 1273.535 | 1273.853 | 1274.323 |           |           | 1528.832 | 1529.467 | 1529.602 | 1529.535 |
| 1276.967 |           | 1273.669 | 1273.815 | 1274.183 | 1275.416 | 1537.995  |           | 1530.933 | 1531.357 | 1531.207 | 1531.007 |
| 1276.968 | 1274.0191 | 1274.304 | 1274.333 | 1274.849 | 1275.711 | 1537.996  |           | 1531.409 | 1531.506 | 1531.648 | 1531.821 |
| 1276.968 | 1286.7517 | 1282.957 | 1303.862 | 1300.613 | 1303.882 | 1537.996  |           | 1531.932 | 1531.872 | 1532.011 | 1532.226 |
| 1302.816 |           | 1303.152 | 1304.162 | 1303.465 | 1304.253 | 1537.996  |           | 1532.323 | 1532.084 | 1532.397 | 1532.377 |
| 1302.817 |           | 1303.437 | 1304.487 | 1304.161 | 1305.048 |           | 1544.3372 | 1543.753 | 1544.659 | 1543.92  | 1545.543 |
| 1302.817 |           | 1304.019 | 1304.643 | 1304.655 | 1305.245 | 1566.623  |           | 1557.779 | 1558.223 | 1558.307 | 1557.883 |
|          |           | 1304.273 | 1304.93  | 1304.904 | 1305.399 | 1566.623  |           | 1558.528 | 1558.441 | 1558.538 | 1558.761 |
|          | 1305.5465 | 1304.882 | 1320.423 | 1319.871 | 1311.729 | 1566.623  |           | 1558.922 | 1558.825 | 1559.099 | 1559.142 |
| 1334.492 |           | 1329.412 | 1329.996 | 1329.842 | 1330.406 | 1608.096  |           | 1600.952 | 1601.727 | 1601.409 | 1601.258 |
| 1334.492 |           | 1330.112 | 1330.489 | 1330.52  | 1330.519 | 1608.096  |           | 1602.227 | 1602.18  | 1601.706 | 1601.933 |
| 1334.493 |           | 1330.622 | 1330.653 | 1330.914 | 1330.982 | 1608.096  |           | 1602.464 | 1602.592 | 1603.02  | 1602.697 |
| 1334.494 |           | 1331.332 | 1331.114 | 1331.721 | 1331.692 | 1608.096  |           | 1602.642 | 1602.76  | 1603.191 | 1602.991 |
| 1335.3   |           | 1343.383 | 1344.596 | 1343.738 | 1344.185 | 1608.097  |           | 1603.062 | 1603.04  | 1603.233 | 1603.649 |
| 1335.301 |           | 1343.575 | 1344.837 | 1344.484 | 1344.531 | 1617.343  |           | 1609.216 | 1609.624 | 1609.73  | 1609.443 |
| 1335.301 |           | 1344.37  | 1345.052 | 1345.168 | 1345.923 | 1617.343  |           | 1609.981 | 1609.941 | 1609.922 | 1609.821 |
| 1335.302 |           | 1344.637 | 1345.74  | 1345.792 | 1346.032 | 1617.343  |           | 1610.222 | 1610.057 | 1610.477 | 1610.247 |
|          |           | 1345.158 | 1346.122 | 1346.443 | 1346.707 | 1617.343  |           | 1610.499 | 1610.199 | 1610.863 | 1610.655 |
| 1371.054 | 1343.4133 | 1345.864 | 1356.244 | 1352.73  | 1349.872 | 1617.343  |           | 1610.799 | 1610.958 | 1610.991 | 1611.298 |
| 1371.054 |           | 1356.457 | 1361.786 | 1361.916 | 1361.665 |           | 1643.6669 | 1644.238 | 1649.698 | 1644.013 | 1648.09  |
| 1371.055 |           | 1361.507 | 1362.721 | 1362.335 | 1362.424 | 1659.5986 |           | 1660.279 | 1661.73  | 1660.007 | 1656.082 |
| 1371.055 |           | 1362.033 | 1363.214 | 1363.469 | 1362.916 | 1669.9486 |           | 1670.591 | 1671.811 | 1669.86  | 1669.338 |
| 1371.055 | 1360.6090 | 1363.549 | 1365.644 | 1364.104 | 1363.511 | 1693.1233 |           | 1692.343 | 1692.204 | 1684.719 | 1687.118 |
| 1372.232 | 1385.7158 | 1383.653 | 1383.907 | 1389.019 | 1387.445 | 1719.6897 |           | 1713.332 | 1710.584 | 1710.304 | 1693.05  |
| 1372.232 | 1416.8690 | 1413.571 | 1410.438 | 1405.079 | 1405.623 | 2957.9094 |           | 2776.556 | 2934.998 | 2690.331 | 2978.485 |

**Table 4** Calculated normal mode wavenumbers (in  $\text{cm}^{-1}$ ) for C60, isolated LDOPAc (I), and the A, B, C, D adsorption geometries of LDOPAc on C60.

| C60       | I        | A        | B        | C        | D |
|-----------|----------|----------|----------|----------|---|
| 3073.3663 | 3069.949 | 3041.958 | 3042.715 | 3066.595 |   |
| 3132.3986 | 3130.928 | 3098.437 | 3098.022 | 3120.262 |   |
| 3149.0499 | 3146     | 3126.6   | 3124.527 | 3129.83  |   |
| 3185.4488 | 3182.902 | 3188.898 | 3180.935 | 3195.169 |   |
| 3207.0810 | 3204.918 | 3210.75  | 3204.802 | 3205.184 |   |
| 3218.3035 | 3217.797 | 3214.076 | 3207.011 | 3209.263 |   |
| 3231.1384 | 3359.522 | 3226.892 | 3375.53  | 3229.555 |   |
| 3300.7728 | 3437.278 | 3305.611 | 3468.227 | 3297.559 |   |
| 3663.2523 | 3663.722 | 3663.74  | 3665.342 | 3663.569 |   |
| 3740.1307 | 3740.524 | 3740.659 | 3740.809 | 3740.379 |   |
